# Supplementary material for: Velocity increases at Cook Glacier, East Antarctica linked to ice shelf loss and a subglacial flood event
Source: Copernicus journal article supplement (doi:10.5194/tc-2018-107), 2018-06-01
Supplement: Supplementary file 1 [file tc-2018-107-supplement.pdf]

## Supplementary Tables

**Table S1:** Sources of imagery used to map ice-front position change

| Date      | Satellite                             |
|-----------|---------------------------------------|
| 1947      | Operation Highjump aerial photography |
| 1963      | ARGON                                 |
| 1973-74   | Landsat 1                             |
| 1989      | Landsat 4                             |
| 1997      | RADARSAT-1                            |
| 2000-2012 | Landsat 7                             |
| 2002-2006 | ASTER                                 |
| 2013-2018 | Landsat 8                             |

**Table S2:** Image pairs and associated error for feature tracking on Cook East Glacier.

| Date       | Satellite          | Resolution (m) | Co-registration error (m) | Displacement error (m) | Total Error per year (m) |
|------------|--------------------|----------------|---------------------------|------------------------|--------------------------|
| 05/03/1989 | Landsat 4 - Band 4 | 30             | 30                        | 15                     | 51                       |
| 16/11/1989 | Landsat 4 - Band 4 | 30             |                           |                        |                          |
| 23/02/2000 | Landsat 7 - Band 8 | 15             | 15                        | 7.5                    | 19                       |
| 17/11/2001 | Landsat 7 -Band 8  | 15             |                           |                        |                          |
| 12/12/2005 | ASTER - Band 3     | 15             | 15                        | 7.5                    | 23                       |
| 01/12/2006 | Landsat 7 - Band 8 | 15             |                           |                        |                          |
| 01/12/2006 | Landsat 7 - Band 8 | 15             | 15                        | 7.5                    | 22                       |
| 04/12/2007 | Landsat 7 -Band 8  | 15             |                           |                        |                          |
| 04/12/2007 | Landsat 7 - Band 8 | 15             | 15                        | 7.5                    | 22                       |
| 07/12/2008 | Landsat 7 -Band 8  | 15             |                           |                        |                          |
| 07/12/2008 | Landsat 7 - Band 8 | 15             | 15                        | 7.5                    | 23                       |
| 07/11/2009 | Landsat 7 -Band 8  | 15             |                           |                        |                          |
| 07/11/2009 | Landsat 7 - Band 8 | 15             | 15                        | 7.5                    | 22                       |
| 10/11/2010 | Landsat 7 -Band 8  | 15             |                           |                        |                          |
| 10/11/2013 | Landsat 8 - Band 8 | 15             | 15                        | 7.5                    | 24                       |
| 10/09/2014 | Landsat 8 - Band 8 | 15             |                           |                        |                          |
| 10/09/2014 | Landsat 8 - Band 8 | 15             | 15                        | 7.5                    | 21                       |
| 16/11/2015 | Landsat 8 - Band 8 | 15             |                           |                        |                          |
| 16/11/2015 | Landsat 8 - Band 8 | 15             | 15                        | 7.5                    | 22                       |
| 05/12/2016 | Landsat 8 - Band 8 | 15             |                           |                        |                          |

**Table S3:** Image pairs and associated error for feature tracking on Cook West Glacier.

| Date       | Satellite          | Resolution (m) | Co-registration error (m) | Displacement error (m) | Total Error per year (m) |
|------------|--------------------|----------------|---------------------------|------------------------|--------------------------|
| 04/11/1973 | Landsat 1 - Band 4 | 60             | 60                        | 30*                    | 450                      |
| 16/01/1974 | Landsat 1 - Band 4 | 60             |                           |                        |                          |
| 05/03/1989 | Landsat 4 - Band 4 | 30             | 30                        | 15                     | 51                       |
| 16/11/1989 | Landsat 4 - Band 4 | 30             |                           |                        |                          |
| 17/12/2001 | Landsat 7 - Band 8 | 15             | 15                        | 7.5                    | 24                       |
| 10/10/2002 | ASTER - Band 3     | 15             |                           |                        |                          |
| 14/10/2006 | ASTER - Band 3     | 15             | 15                        | 7.5                    | 22                       |
| 09/11/2007 | Landsat 7 - Band 8 | 15             |                           |                        |                          |
| 12/11/2008 | Landsat 7 - Band 8 | 15             | 15                        | 7.5                    | 22                       |
| 14/11/2009 | Landsat 7 -Band 8  | 15             |                           |                        |                          |
| 17/01/2010 | Landsat 7 - Band 8 | 15             | 15                        | 7.5                    | 22                       |
| 20/01/2011 | Landsat 7 -Band 8  | 15             |                           |                        |                          |
| 20/01/2011 | Landsat 7 - Band 8 | 15             | 15                        | 7.5                    | 22                       |
| 08/02/2012 | Landsat 7 -Band 8  | 15             |                           |                        |                          |
| 20/01/2014 | Landsat 8 - Band 8 | 15             | 15                        | 7.5                    | 22                       |
| 15/02/2015 | Landsat 8 - Band 8 | 15             |                           |                        |                          |
| 15/02/2015 | Landsat 8 - Band 8 | 15             | 15                        | 7.5                    | 24                       |
| 01/01/2016 | Landsat 8 - Band 8 | 15             |                           |                        |                          |
| 01/01/2016 | Landsat 8 - Band 8 | 15             | 15                        | 7.5                    | 22                       |
| 13/02/2017 | Landsat 8 - Band 8 | 15             |                           |                        |                          |

**Table S4:** Image pairs and associated error for ice-front advance rate on Cook East Glacier.

| Date    | Satellite   | Resolution (m) | Co-registration error (m) | Mapping error (m) | Total Error (m yr <sup>-1</sup> ) | Advance (m) | Advance (m yr <sup>-1</sup> ) |
|---------|-------------|----------------|---------------------------|-------------------|-----------------------------------|-------------|-------------------------------|
| 11/1973 | Landsat 1   | 60             | 60                        | 30                | 6                                 | 10924       | 712                           |
| 03/1989 | Landsat 4   | 30             |                           |                   |                                   |             |                               |
| 03/1989 | Landsat 4   | 30             | 30                        | 30                | 86                                | 480         | 685                           |
| 11/1989 | Landsat 4   | 30             |                           |                   |                                   |             |                               |
| 11/1989 | Landsat 4   | 30             | 30                        | 30                | 8                                 | 5645        | 717                           |
| 10/1997 | RADARSAT    | 25             |                           |                   |                                   |             |                               |
| 10/1997 | RADARSAT    | 25             | 25                        | 25                | 21                                | 1725        | 720                           |
| 02/2000 | Landsat 7   | 15             |                           |                   |                                   |             |                               |
| 02/2000 | Landsat 7   | 15             | 15                        | 15                | 17                                | 1278        | 737                           |
| 11/2001 | Landsat 7   | 15             |                           |                   |                                   |             |                               |
| 11/2001 | Landsat 7   | 15             | 15                        | 15                | 27                                | 817         | 742                           |
| 12/2002 | Landsat 7   | 15             |                           |                   |                                   |             |                               |
| 12/2002 | Landsat 7   | 15             | 15                        | 15                | 8                                 | 2939        | 749                           |
| 12/2006 | Landsat 7   | 15             |                           |                   |                                   |             |                               |
| 12/2006 | Landsat 7   | 15             | 15                        | 15                | 30                                | 798         | 792                           |
| 12/2007 | Landsat 7   | 15             |                           |                   |                                   |             |                               |
| 12/2007 | Landsat 7   | 15             | 15                        | 15                | 30                                | 754         | 747                           |
| 12/2008 | Landsat 7   | 15             |                           |                   |                                   |             |                               |
| 12/2008 | Landsat 7   | 15             | 15                        | 15                | 33                                | 694         | 757                           |
| 11/2009 | Landsat 7   | 15             |                           |                   |                                   |             |                               |
| 11/2009 | Landsat 7   | 15             | 15                        | 15                | 30                                | 747         | 741                           |
| 11/2010 | Landsat 7   | 15             |                           |                   |                                   |             |                               |
| 11/2010 | Landsat 7   | 15             | 15                        | 8                 | 21                                | 846         | 758                           |
| 12/2011 | WorldView-2 | 0.5            |                           |                   |                                   |             |                               |
| 12/2011 | WorldView-2 | 0.5            | 0.5                       | 0.5               | 1                                 | 774         | 762                           |
| 12/2012 | WorldView-2 | 0.5            |                           |                   |                                   |             |                               |
| 12/2012 | WorldView-2 | 0.5            | 15                        | 8                 | 26                                | 666         | 768                           |
| 11/2013 | Landsat 8   | 15             |                           |                   |                                   |             |                               |
| 11/2013 | Landsat 8   | 15             | 15                        | 15                | 36                                | 620         | 745                           |
| 09/2014 | Landsat 8   | 15             |                           |                   |                                   |             |                               |
| 09/2014 | Landsat 8   | 15             | 15                        | 15                | 25                                | 899         | 760                           |
| 11/2015 | Landsat 8   | 15             |                           |                   |                                   |             |                               |
| 11/2015 | Landsat 8   | 15             | 15                        | 15                | 28                                | 799         | 758                           |
| 12/2016 | Landsat 8   | 15             |                           |                   |                                   |             |                               |
